# Supplementary material for: The N-Terminus Makes the Difference: Impact of Genotype-Specific Disparities in the N-Terminal Part of The Hepatitis B Virus Large Surface Protein on Morphogenesis of Viral and Subviral Particles
Source: MDPI journal article supplement (doi:10.3390/cells9081898), 2020-08-13
Supplement: s1 [file s1]

**Table S1: Primers used for mutagenesis PCR.**

| Name                | Primer Sequences                                              | Remarks                                    |
|---------------------|---------------------------------------------------------------|--------------------------------------------|
| $\Delta$ 11aa_fw    | CCATATTCTTGGGAACAAGAGCTACAGCTAGGGAGG<br>TTGG                  | The first ATG of PreS1 was mutated to TAG. |
| $\Delta$ 11aa_rev   | GCGAGGTTTTGATGACCAACCTCCCTAGCTGTAGC                           |                                            |
| (+)11aa(GtA)_fw     | TCACCATATTCTTGGGAACAAGATCTACAGCATGGGA<br>GGTTGGTCATCAAACCTCGC |                                            |
| (+)11aa(GtA)_rev    | GCTGGTGGAAAGATTCTGCCCCATGCCTTTGCGAGGT<br>TTTGATGACCAAC        |                                            |
| (+)10aa(GtE)_fw     | ACCATATTCTTGGGAACAAGATCTACAGCATGGGGCT<br>TTCTTGGACGGTCCCTCTCG |                                            |
| (+)10aa(GtE)_rev    | TTGCTGGTGGAAAGATTCTGCCCCATTTCGAGAGGGA<br>CCGTCCAAG            |                                            |
| $\Delta$ aa2-7_fw   | GGTCACCATATTCTTGGGAACAAGAGCTACAGCATGC<br>CTCGCAAAG            |                                            |
| $\Delta$ aa2-7_rev  | GAACAGAAAGATTTCGTCCCCATGCCTTTGCGAGGCAT<br>GCTGTA              |                                            |
| $\Delta$ aa3-8_fw   | GGTCACCATATTCTTGGGAACAAGAGCTACAGCATG<br>GGACGCAAAG            |                                            |
| $\Delta$ aa3-8_rev  | GAACAGAAAGATTTCGTCCCCATGCCTTTGCGTCCCAT<br>GCTGTA              |                                            |
| $\Delta$ aa4-9_fw   | GGTCACCATATTCTTGGGAACAAGAGCTACAGCATG<br>GGAGGAAAAGG           |                                            |
| $\Delta$ aa4-9_rev  | GAACAGAAAGATTTCGTCCCCATGCCTTTTCCTCCCAT<br>GCTGTAG             |                                            |
| $\Delta$ aa5-10_fw  | GGTCACCATATTCTTGGGAACAAGAGCTACAGCATG<br>GGAGGTTGGG            |                                            |
| $\Delta$ aa5-10_rev | GAACAGAAAGATTTCGTCCCCATGCCCCAACCTCCCAT<br>GCTGTA              |                                            |
| $\Delta$ aa6-11_fw  | GGTCACCATATTCTTGGGAACAAGAGCTACAGCATG<br>GGAGGTTGGT            |                                            |
| $\Delta$ aa6-11_rev | GGGAACAGAAAGATTTCGTCCCCATTGACCAACCTCC<br>CATGCTGTA            |                                            |
| GtA_aa3-8(GtE)_fw   | GGGAACAAGAGCTACAGCATGGGACTTTCTTGGACG<br>GTCCCTC               |                                            |
| GtA_aa3-8(GtE)_rev  | GATTTCGTCCCCATGCCTTTGCGAGGGACCGTCCAAGA<br>AAG                 |                                            |
| GtA_aa7-12(GtE)_fw  | ACAGCATGGGAGGTTGGTCATCAACGGTCCCTCTCGA<br>GTGGG                |                                            |
| GtA_aa7-12(GtE)_rev | GGTTGGGAACAGAAAGATTTCGTCCCCACTCGAGAG<br>GGACCGT               |                                            |
| $\Delta$ aa2-5_fw   | TTTGCGGGTCACCATATTCTTGGGAACAAGAGCTACA<br>GCATGTCAAACCTCG      |                                            |
| $\Delta$ aa2-5_rev  | TGGGAACAGAAAGATTTCGTCCCCATGCCTTTGCGAGG<br>TTTTGACATGCTGTAG    |                                            |
| $\Delta$ aa6-8_fw   | GTCACCATATTCTTGGGAACAAGAGCTACAGCATGG<br>GAGGTTGGTCACGCAAAGGC  |                                            |
| $\Delta$ aa6-8_rev  | CCCAGAGGGTTGGGAACAGAAAGATTTCGTCCCCATG<br>CCTTTCGTGACCAAC      |                                            |
| $\Delta$ aa9-11_fw  | GGGAACAAGAGCTACAGCATGGGAGGTTGGTCATCA<br>AAACCTATGGGGACGAA     |                                            |
| $\Delta$ aa9-11_rev | GAAAGAATCCCAGAGGGTTGGGAACAGAAAGATTTCG<br>TCCCCATAGGTTTTGAT    |                                            |

|                     |                                                              |                                                                                                     |
|---------------------|--------------------------------------------------------------|-----------------------------------------------------------------------------------------------------|
| K7M_fw              | CGGGTCACCATATTCTTGGGAACAAGAGCTACAGCA<br>CGGGAGGTTGGTCATCAAT  | The first ATG of PreS1 was mutated to ACG. The lysine at position 7 was mutated to methionine.      |
| K7M_rev             | ACAGAAAGATTCGTCCCCATGCCTTTGCGAGGCATTG<br>ATGACCAACCTCCCC     |                                                                                                     |
| GtA_aa2-6(GtE)_fw   | GGGAACAAGAGCTACAGCATGGGACTTTCTTGGAAA<br>CCTC                 |                                                                                                     |
| GtA_aa2-6(GtE)_rev  | TCCCCATGCCTTTGCGAGGTTTCCAAGAAAGTCCCAT                        |                                                                                                     |
| GtA_aa2-12(GtE)_fw  | GGGAACAAGAGCTACAGCATGGGGCTTTCTTGGACG<br>GTCCCTCTCG           |                                                                                                     |
| GtA_aa2-12(GtE)_rev | GTTGGGAACAGAAAGATTCGTCCCCATTTCGAGAGG<br>GACCGTCCAAG          |                                                                                                     |
| W5M_fw              | ACCTTATTCTTGGGAACAAGAGCTACATCACGGGGCT<br>TTCTATGAC           | The first ATG of PreS1 was mutated to ACG. The tryptophan at position 5 was mutated to methionine.  |
| W5M_rev             | TCCCCATTTCGAGAGGGACCGTCATAGAAAGCCCCG<br>TG                   |                                                                                                     |
| P8M_fw              | CACCTTATTCTTGGGAACAAGAGCTACATCACGGGGC<br>TTTCTTGGACGGTCA     | The first ATG of PreS1 was mutated to ACG. The proline at position 8 was mutated to methionine.     |
| P8M_rev             | GGTGGGAATGATTCTTCCCCATTTCGAGCATGACCGTC<br>CAAGAAAGCC         |                                                                                                     |
| W11M_fw             | CACCTTATTCTTGGGAACAAGAGCTACATCACGGGGC<br>TTTCTTGGACGGTCCCTCT | The first ATG of PreS1 was mutated to ACG. The tryptophan at position 11 was mutated to methionine. |
| W11M_rev            | AGGATTGGTGGTGGGAATGATTCTTCCCCATTTCGAGA<br>GGGACCGTCCAAGAA    |                                                                                                     |

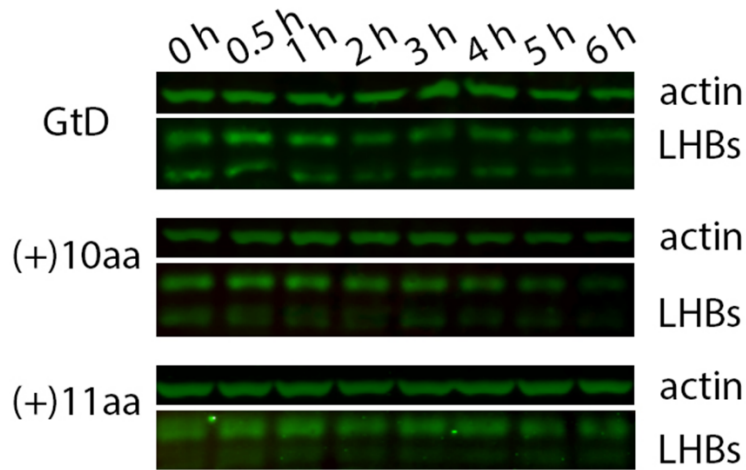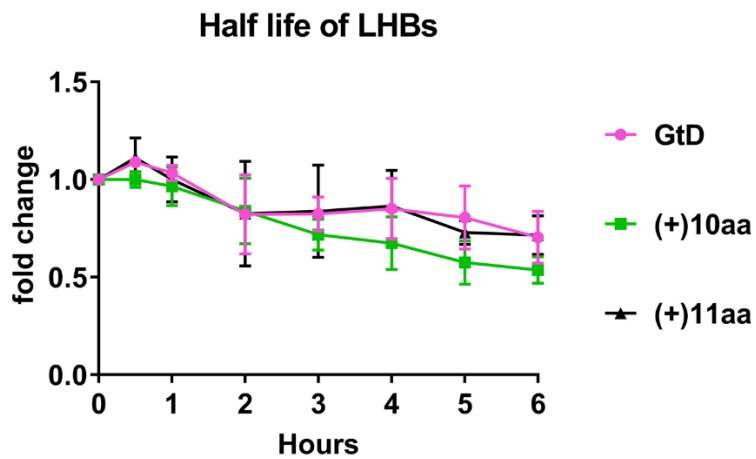

|                  | GtD         | (+)10aa      | (+)11aa      |
|------------------|-------------|--------------|--------------|
| <b>Half Life</b> | <b>11.1</b> | <b>6.178</b> | <b>10.39</b> |

**Figure S1.** 11 aa-associated higher amount of LHBs does not correlate with longer protein half life. Huh7.5 cells transfected with genomes GtD and the derivatives were treated with 100  $\mu$ g/ml cycloheximide (CHX) up to 6 hours. The lysates were analyzed by Western blot using a PreS1-specific serum (MA18/7).  $\beta$ -actin was used as loading control. The signals of LHBs and  $\beta$ -actin in the Western blot were quantified by Image studio lite from LI-COR Biosciences. The signal from untreated sample was standardized as 1. These quantitative data are mean values from three independent experiments.

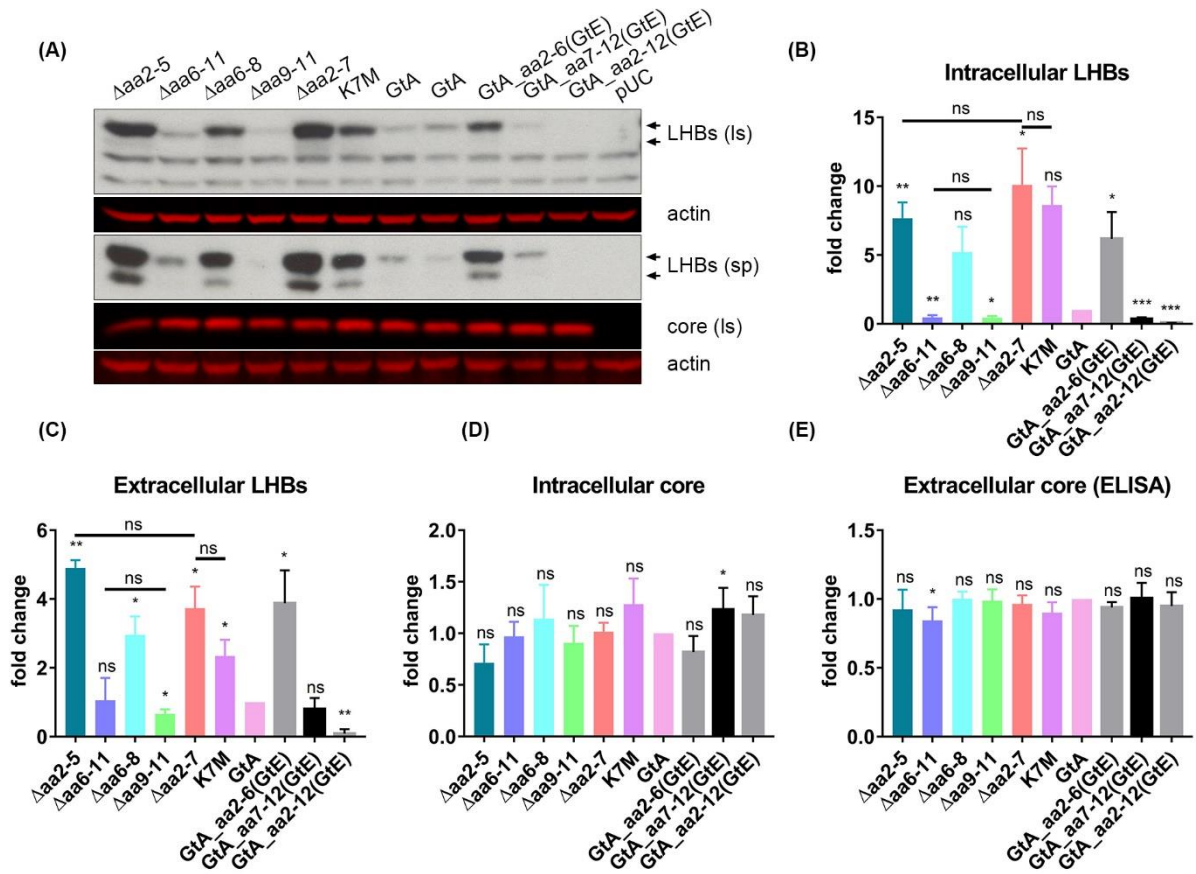

**Figure S2.** Deletion of only 3 aa in the GtA-derived 11 aa alters dramatically the amount of LHBs. (A) Supernatants and lysates from Huh7.5 cells transfected with genomes GtA and the derivatives were analyzed by Western blot using the PreS1-specific serum (MA18/7) and the core-specific serum (K46).  $\beta$ -actin was used as loading control. (B-D) The signals of LHBs and core in the Western blot were quantified by Image studio lite from LI-COR Biosciences. (E) Supernatants from Huh7.5 cells transfected with genomes GtA and the derivatives were analyzed by core ELISA. The signal from GtA was standardized as 1. Ls, lysate; sp, supernatant. These quantitative data are mean values from three independent experiments.

HBsAg ELISA of supernatants from HepaRG infected by GtA and its derivatives (MOI=1600)

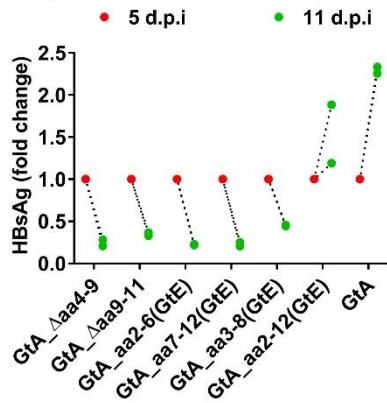

HBsAg ELISA of supernatants from differentiated HepaRG infected by GtA and GtA\_aa2-12(GtE)

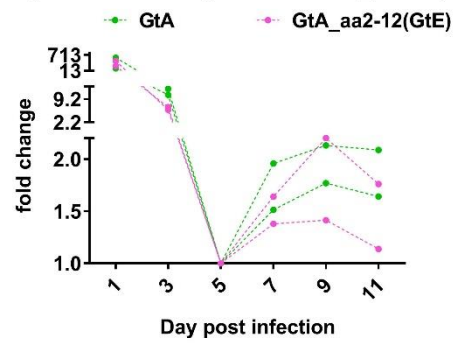

**Figure S3.** Substitution the N-terminal 11 aa in PreS1 domain of GtA with N-terminal 10 aa in the PreS1 domain of GtE does not impair the viral infectivity. Differentiated HepaRG were infected with HBV from GtA and its derivatives at MOI 1600. Culture supernatants collected at every two days post infection and samples from 5 d.p.i and 11 d.p.i (days post infection) were analyzed by HBsAg ELISA (left panel). To further confirm the successful infection established by virus from GtA\_aa2-12(GtE), culture supernatants collected at indicated time points were analyzed by HBsAg ELISA. These data are from two independent experiments.
